# Supplementary material for: The evolution of stable silicon isotopes in a coastal carbonate aquifer on Rottnest Island, Western Australia
Source: Copernicus journal article supplement (doi:10.5194/hess-25-3837-2021), 2021-07-02
Supplement: Supplementary file 1 [file hess-25-3837-2021-supplement.zip]

Archive with 2 entries (2 files):
- hess-25-3837-2021-supplement-title-page.pdf
- Table S1.csv
