# Supplementary material for: The evolution of stable silicon isotopes in a coastal carbonate aquifer on Rottnest Island, Western Australia
Source: Copernicus journal article supplement (doi:10.5194/hess-25-3837-2021), 2021-07-02
Supplement: Supplementary file 1 [file hess-25-3837-2021-supplement.zip › hess-25-3837-2021-supplement-title-page.pdf]

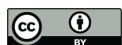

*Supplement of*

**The evolution of stable silicon isotopes in a coastal carbonate aquifer on Rottnest Island, Western Australia**

**Ashley N. Martin et al.**

*Correspondence to:* Ashley N. Martin ([a.martin@mineralogie.uni-hannover.de](mailto:a.martin@mineralogie.uni-hannover.de))

- [hess-25-3837-2021-supplement-title-page.pdf](#)
- [Table S1.csv](#)

The copyright of individual parts of the supplement might differ from the article licence.
