# Supplementary material for: The evolution of stable silicon isotopes in a coastal carbonate aquifer on Rottnest Island, Western Australia
Source: Copernicus journal article supplement (doi:10.5194/hess-25-3837-2021), 2021-07-02
Supplement: Supplementary file 1 [file hess-25-3837-2021-supplement.zip › Table S1.csv]

ID	Mixing type	Sample Type	Sample Date	Screen Elevation	T	pH	Field Alkalinity	DO	Density	TDS	Ca2+	Mg2+	Na+	K+	Li	Sr	Cl-	Br-	SO42-	HCOs-	CBE	DIC	13CDIC	14CDIC	DOC	13CDOC	14CDOC	3H	d7Li	87Sr/86Sr	d30Si
-	-	-	-	m AHD	oC	-	mg/L CaCO3	mg/l	g/cm3	mg/l	mM	mM	mM	mM	_M	_M	mM	mM	mM	mM	%	mM	‰	pmc	mg/L	PDB11	pMC	TU	�	-	�
				Bryan et al. (2016)	Bryan et al. (2016)	Bryan et al. (2016)	Bryan et al. (2016)	Bryan et al. (2016)	Bryan et al. (2016)	Bryan et al. (2016)	Bryan et al. (2016)	Bryan et al. (2016)	Bryan et al. (2016)	Bryan et al. (2016)	Martin et al. (in review)	Martin et al. (in review)	Bryan et al. (2016)	Bryan et al. (2016)	Bryan et al. (2016)	Bryan et al. (2016)	Bryan et al. (2016)	Bryan et al. (2017)	Bryan et al. (2017)	Bryan et al. (2017)	Bryan et al. (2017)	Bryan et al. (2017)	Bryan et al. (2017)	Bryan et al. (2017)	this study	this study	this study
RI_2-77	F	Prod	9/29/14	-0.11	19	7.6	225.7	1.8	1	672	1.02	1.66	4.25	0.14	1.01	30	4.55	0.01	0.47	4.49	-1	4.72	-7	52.5	1.18	-24.96		0.93	29.4	0.7091717	0.68
RI_3-77	F	Prod	9/29/14	-0.01	16	7.5	261.6	1.5	1	776	1.25	2.05	4.53	0.13	0.86	30	5.06	0.01	0.65	5.21	-1.3	5.59	-8.2	56.64	1.13	-25.01	88.91	0.89	35.7	0.7091879	0.66
RI_1-83	F	Prod	9/28/14	0.09	17	7.5	233.6	1.6	1	789	1.35	1.84	4.92	0.13	1.44	40	6.13	0.01	0.64	4.65	-2.5	4.96	-8.6	66.53	1.96	-24.66	105.62	0.96	30.4	0.7091674	1.28
RI_4-83	F	Prod	9/30/14	-0.11	17	7.8	216.8	4.2	1	674	1.05	1.95	3.78	0.13	1.01	40	4.44	0.01	0.66	4.29	-0.6	4.47	-5.9	45.32	1.24	-25.28		1.11	34.3	0.7091673	1
RI_2-90	F	Prod	9/29/14	-0.5	19	7.8	201.8	3.6	1	605	1.02	1.54	3.57	0.1	0.72	20	4.24	0.01	0.41	4	-1.4	4.16	-6.5	41.81	0.56	-26.51		0.87	NA	0.7091843	1.24
RI_6-90	F	Prod	9/29/14	-0.64	19	7.7	232.4	3.4	1	799	1.47	1.63	5.36	0.13	1.15	20	6.75	0.01	0.46	4.61	-2.5	4.83	-8.6	67.68	1.02	-26.26		0.62	30.8	0.7091981	2.26
RI_16-90	F	Prod	9/28/14	-0.28	17	7.4	263	1.3	1	812	1.57	1.9	4.71	0.14	1.73	40	5.91	0.01	0.54	5.24	-1.6	5.65	-9.8	74.13	2.9	-26.09	99.78	0.96	33.9	0.7091815	1.53
RI_17-90	F	Prod	9/30/14	0.06	17	7.9	229.4	3.5	1	787	1.17	2.02	5.05	0.15	1.3	40	5.93	0.01	0.74	4.52	-1.4	4.68	-8.6	66.12	1.53	-25.49	93.73		35.4	0.7091795	1.12
RI_3-93	F	Prod	9/29/14	-0.27	19	7.6	210	2.9	1	833	1.17	2.02	6.06	0.13	1.3	30	7.52	0.01	0.66	4.17	-1.6	4.41	-5.9	44.45	0.83	-25.99			35.4	0.7091884	2.58
RI_6-93	F	Prod	9/29/14	-0.22	17	7.6	229.8	4	1	713	1.17	1.68	4.33	0.12	1.15	20	5.48	0.01	0.42	4.57	-3.5	4.81	-5.8	46.39	0.78	-26.58			22.8	0.7091924	1.61
RI_1-94	F	Mon	9/28/14	-0.53	19	7.7	231.4	4.6	1	667	1.52	1.34	3.73	0.11	1.3	10	4.55	0.01	0.37	4.58	-1.6	4.79	-9.7	85.76	0.6	-25.24		1.16	NA	NA	0.22
RI_2-94	F	Mon	9/28/14	-1	19	7.6	176.7	7.1	1	474	1.45	0.7	2.27	0.08	0.58	10	2.68	0	0.29	3.52	-1	3.72	-11	95.23	0.6	-25.33		1.35	NA	NA	0.97
RI_1-90	T1	Prod	9/29/14	-0.9	16	7.5	254.5	2.5	1	2461	1.88	3.84	26.42	0.62	2.45	50	35.06	0.06	1.04	5.07	-4.6	5.39	-6.7	48.5	1.4	-26.92		0.67	29.4	0.7091802	1.52
RI_8-90	T1	Prod	9/29/14	-0.59	19	7.4	311	1.9	1	1144	1.45	2.57	8.89	0.26	1.58	30	9.24	0.02	0.97	6.19	-0.5	6.67	-7.3	56.81	2.02	-25.86	97.5		35.5	0.7091861	2.81
RI_7-90	T1	Mon	3/12/15	-7.06	22	7.4	185	3.3	1.01	20676	6.81	31.48	275.43	5.64	NA	60	320.86	0.51	16.35	3.65	0	3.86	-3.1	21.17	0.1	-30.3		0.67	NA	0.7091981	NA
RI_13-90	T1	Mon	3/11/15	-3.55	20	7.2	197.5	0.5	1	4997	2.5	7.59	59.33	1.19	0	80	74.12	0.11	2.86	6.42	-3.3	7.23	-4.1	23.99	1	-28.6		0.21	33	NA	1.24
RI_21-90	T1	Mon	9/26/14	-4.04	19	7.4	325	0.3	1	3584	2.9	5.61	38.46	1.06	3.89	30	46.38	0.07	3.76	6.47	-3.3	7	-9	59.33	2.8	-25.9	91.48	0.62	18.3	NA	1.44
RI_24-90	T1	Mon	9/26/14	-3.47	19	7.6	275.6	0.4	1	1211	1.48	2.62	9.02	0.28	2.02	40	11.87	0.02	1.11	5.48	-5.6	5.81	-7.4	56.31	2.2	-24.83	94.8	0.65	33.2	NA	1.22
RI_28-90	T1	Mon	9/26/14	-1.52	20	7.5	245.7	1.1	1	1986	2.2	2.6	20.61	0.53	2.31	40	27.36	0.04	0.67	4.89	-4.4	5.23	-9.8	77.03	0.8	-26.59	83.97	0.95	30.2	NA	-0.39
RI_3-94	T1	Mon	9/27/14	-0.72	18	7.6	251.3	3	1	1244	1.8	2.03	10.81	0.25	1.44	10	13.68	0.02	0.73	4.99	-3.7	5.29	-11	97.21	0.8	-26.61		1.04	21.6	NA	1.79
RI_4-94	T1	Mon	9/27/14	-1.83	18	7.6	287.2	2.4	1	1075	1.4	2.79	7.32	0.2	1.44	50	8.9	0.02	1.04	5.69	-2.3	5.99	-6.7	54.68	1.3	-25.44		0.67	NA	NA	1.23
RI_5-94	T1	Mon	9/27/14	-1.87	19	7.7	252.7	1.1	1	1040	1.28	2.64	7.54	0.24	1.44	60	8.85	0.02	1.17	5.01	-1.7	5.24	-4.1	28.23	0.9	-24.66		0.42	27.3	NA	0.61
RI_5-90	T2	Mon	9/27/14	-6.9	17	7.3	377.5	0.4	1	6868	3.93	10.52	93.34	1.95	10.23	130	97.02	0.19	3.31	7.51	5.5	8.13	-2.3	8.71	1.2	-26.27		0.12	30.8	NA	2.63
RI_11-90	T2	Mon	9/26/14	-6.19	19	7.5	182.6	0.5	1.03	29675	9.58	41.75	383.69	8.04	25.79	130	473.24	0.73	23.01	3.57	-2.8	3.75	-7.3	43.98	1.1	-24.84	57.78	0.09	32.9	NA	3.6
RI_15-90	T2	Mon	9/26/14	-14.92	19	7.5	154.5	0.2	1.02	22977	7.14	32.89	282.81	6.55	17.58	260	380.99	0.55	16.16	3.04	-6.4	3.21	-2.9	8.35	0.5	-25.51		0.03	14.5	NA	2.74
RI_18-90	T2	Mon	9/27/14	-11.16	18	7.4	191.6	0.3	1.02	25267	7.44	37.9	311.96	7.67	22.19	60	409.13	0.62	20.45	3.78	-5.6	4.01	-5.9	35.12	0.2	-23.87	50.61	0.07	NA	NA	2.8
RI_25-90	T2	Mon	9/27/14		18	7.5	208.6	0.3	1.01	14489	4.86	22.19	187.87	3.93	13.4	100	224.96	0.38	11.19	4.11	-1.2	4.33	-2.2	13.18	0.2	-27.07	46.57	0.04	36.3	NA	1.72
RI_27-90	T2	Mon	9/26/14	-4.98	19	7.3	244.8	0.9	1.02	20824	6.99	32.33	288.46	6.12	20.6	100	308.92	0.6	17.47	4.85	3.3	5.22	-3	18.28	0.4	-26.03	66.99	0.29	28.7	NA	2.3
RI_31-90	T2	Mon	9/28/14	-9.2	18	7.6	205.2	0.3	1.01	16344	7.69	25.58	217.12	4.55	14.41	60	244.19	0.43	14.22	4.01	2	4.2	-9.4	52.47	0.9	-31.07	66.93	0.07	24.6	NA	2.08
SW		SW	3/12/15	0	21	8.1	109.8	6.7	1.02	35780	10.12	54.23	480.74	10.48	33.28	70	560.56	0.85	31.35	1.95	-0.5	2.11	0.9		0.4	-24.5			33	NA	NA
